# Supplementary material for: Daily Early-Life Exposures to Diet Soda and Aspartame Are Associated with Autism in Males: A Case-Control Study
Source: MDPI journal article supplement (doi:10.3390/nu15173772), 2023-08-29
Supplement: s1 [file s1]

**Supplemental Table S1b: Adjusted odds ratios<sup>a</sup> (ORs) among all offspring for daily early-life<sup>b</sup> exposures to any NNS<sup>c</sup> or to aspartame specifically<sup>d</sup>**

| Condition in males           | n   | Daily exposure              | ORs  | 95% CI       |
|------------------------------|-----|-----------------------------|------|--------------|
| <b>ASD: all cases</b>        | 344 | ≥1 serving/day of any NNS   | 1.23 | 0.66 to 2.31 |
|                              |     | ≥1 serving/day of aspartame | 1.19 | 0.61 to 2.33 |
|                              |     | ≥177 mg/day of aspartame    | 1.39 | 0.68 to 2.84 |
| <b>Non-regressive ASD</b>    | 266 | ≥1 serving/day of any NNS   | 1.53 | 0.78 to 2.99 |
|                              |     | ≥1 serving/day of aspartame | 1.51 | 0.74 to 3.07 |
|                              |     | ≥177 mg/day of aspartame    | 1.77 | 0.83 to 3.77 |
| <b>Autism</b>                | 277 | ≥1 serving/day of any NNS   | 1.38 | 0.73 to 2.64 |
|                              |     | ≥1 serving/day of aspartame | 1.33 | 0.67 to 2.66 |
|                              |     | ≥177 mg/day of aspartame    | 1.58 | 0.76 to 3.26 |
| <b>Non-regressive autism</b> | 217 | ≥1 serving/day of any NNS   | 1.76 | 0.87 to 3.54 |
|                              |     | ≥1 serving/day of aspartame | 1.68 | 0.80 to 3.53 |
|                              |     | ≥177 mg/day of aspartame    | 2.03 | 0.93 to 4.44 |

<sup>a</sup> Among all 344 offspring in the Autism Tooth Fairy Study, adjusted for mother's id; recruitment source; child's ethnicity (non-Hispanic white vs. other); year of birth; mother's education (≥4 years of college, vs. less), and household income (≥\$100,000/year vs. less).

<sup>b</sup> Early-life exposures: exposures that occurred during gestation and/or breastfeeding, through maternal diet during these times. These were calculated based on aspartame and other NNS intake during this period, retrospectively recalled by biological mothers.

<sup>c</sup> NNS: non-nutritive sweetener:

≥1 serving/day of any NNS denotes either ≥1 packet/day of any NNS, ≥1 DS/day, or ≥1 other diet drink/day. Minimum daily dosage for this category thus varies by NNS: 1 tabletop packet contains 36 mg of saccharin, 12 mg of sucralose, or 37 mg of aspartame, for example.

<sup>d</sup> For aspartame specifically:

≥1 serving/day of aspartame denotes either ≥1 packet/day of aspartame, or ≥1 aspartame-sweetened DS/day, or ≥1 other aspartame-sweetened diet drink/day. Minimum daily dosage for this category is thus 37 mg of aspartame, the dosage in 1 tabletop packet.

≥177 mg/day of aspartame denotes total daily aspartame intake, from the sum of packets + DS + other diet drinks, equivalent to 177 mg, the dosage of aspartame in 1 can of a leading diet cola sweetened only with aspartame.

Bold-highlighted results indicate statistically significantly increased exposure ORs (p<0.05).

OR: odds ratio; NNS: non-nutritive sweetener; CI: confidence interval; ASD: autism spectrum disorder
