# Supplementary material for: Daily Early-Life Exposures to Diet Soda and Aspartame Are Associated with Autism in Males: A Case-Control Study
Source: Nutrients. 2023 Aug 29;15(17):3772. doi: 10.3390/nu15173772 (PMC10490529; doi:10.3390/nu15173772)
Supplement: Supplementary file 1 [file nutrients-15-03772-s001.zip]

Archive with 5 entries (5 files):
- Figure S1a.jpg
- Figure S1b.jpg
- Figure S1c.jpg
- Supplemental Table S1a.pdf
- Supplemental Table S1b.pdf
